# Supplementary material
Source: publisher figshare collection journal article supplement (https://tandf.figshare.com/articles/dataset/_/11171342)

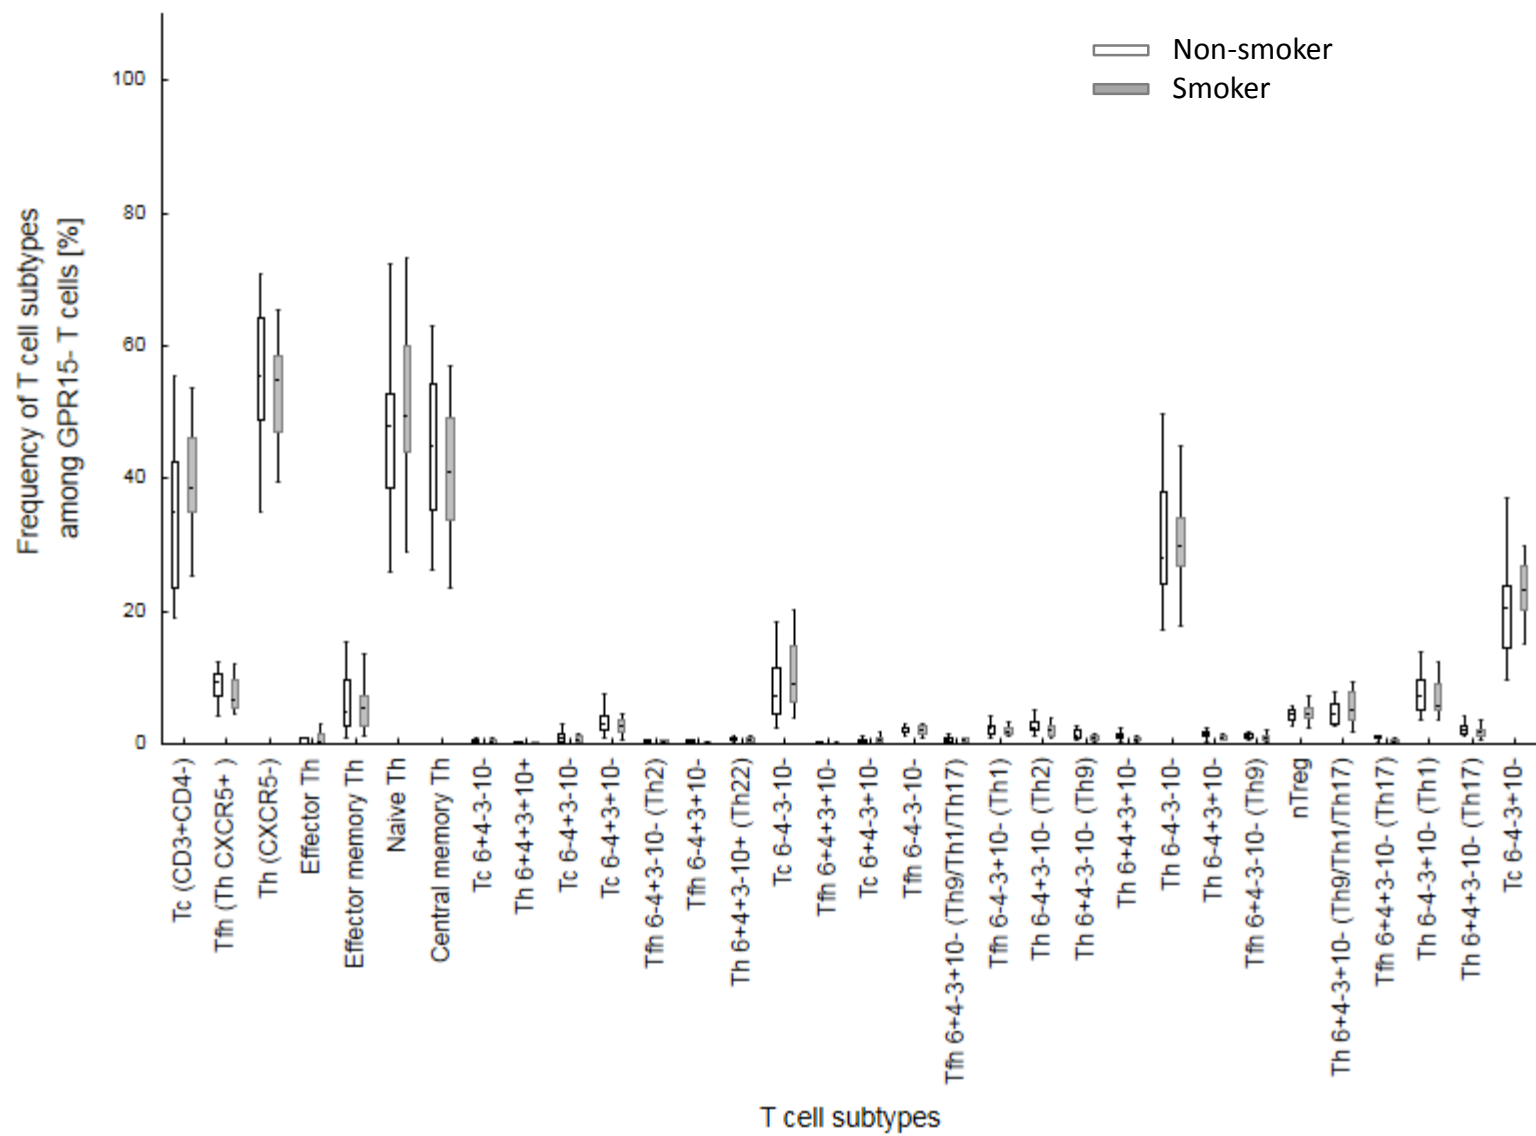

Figure S1

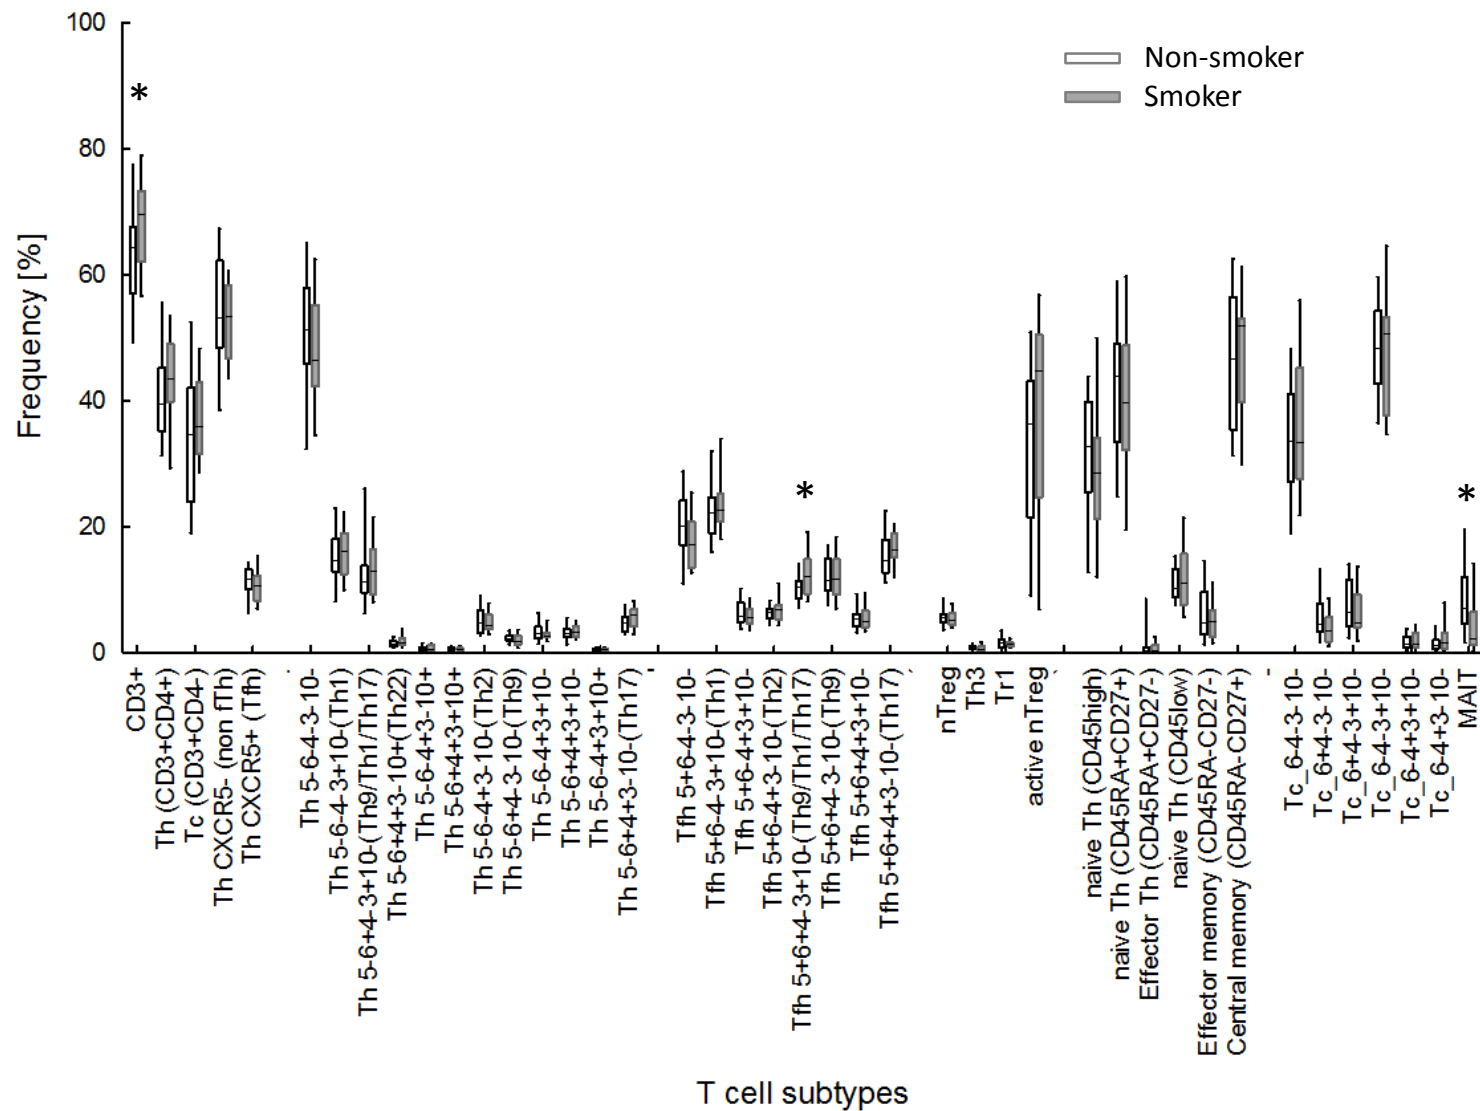

Figure S2

Supplement: Supplementary file 1 [file 1]
